# Supplementary material for: Transcatheter Mitral Valve Repair With the MitraClip Device for Prior Mitral Valve Repair Failure: Insights From the GIOTTO‐FAILS Study
Source: PubMed Central journal article supplement — J Am Heart Assoc. 2024 May 14;13(10):e033605. doi: 10.1161/JAHA.123.033605 (PMC11179807; doi:10.1161/jaha.123.033605), 2024-05-14
Supplement: JAH3-13-e033605-s001.pdf [file JAH3-13-e033605-s001.pdf]

# **SUPPLEMENTAL MATERIAL**

## **Data S1.**

### **Supplemental Methods**

Methodological details on the multicentre Italian Society of Interventional Cardiology (GISe) registry Of Transcatheter treatment of mitral valve regurgitaTiOn (GIOTTO) have been previously reported in detail, including study design, ethical approval and online registration.(24) Specifically, data collection was based on web electronic case report forms (eCRF), periodically crosschecked for accuracy.

Transthoracic and transesophageal echocardiography evaluations were performed at study sites before the procedure. Transesophageal echocardiography was assessed during the procedure and transthoracic echocardiography at discharge and, for the available patients, during the follow-up. All echocardiography parameters were evaluated according to the American Society of Echocardiography recommendations, and the same applied to mitral regurgitation severity, which was graded as follows: 1+ (mild), 2+ (moderate), 3+ (moderate-to-severe) and 4+ (severe).(25) Clinical follow-up data were entered into eCRF by local investigators after being obtained by inpatient or outpatient clinical visits and/or telephone calls scheduled at 30 days, 1 year, and yearly.(24)

Outcomes were adjudicated according to the Mitral Valve Academic Research Consortium by local investigators, and then entered into the dedicated eCRF system.(18) Specifically, device success for transcatheter mitral valve repair was defined as: absence of procedural mortality or stroke, proper placement and positioning of the device, freedom from unplanned surgical or interventional procedures related to the device or access procedure, and continued intended safety and performance of the device, including reduction of mitral regurgitation to either optimal/acceptable levels without significant mitral stenosis, no evidence of structural or functional failure, no specific device-related technical failure issues and complications, no greater than mild paravalvular mitral regurgitation, and no associated hemolysis.

Procedural success for transcatheter mitral valve repair was defined as: device success in the absence of major device or procedure related serious adverse events, including death, stroke, life-threatening bleeding, major vascular complication, major cardiac structural complications, stage 2 or 3 acute kidney injury (includes new dialysis), myocardial infarction or coronary ischemia requiring percutaneous or surgical revascularization, severe hypotension, heart failure, or respiratory failure requiring intravenous pressors or invasive or mechanical heart failure treatments, valve-related dysfunction, migration, thrombosis, or other complication requiring surgery or repeat intervention.

### **Supplemental Results**

The median time between prior MitraClip implantation and subsequent MitraClip redo was 34 months, with a minimum of months and a maximum of 81 months.

An ancillary analysis focusing on the long-term impact of post-procedural mitral gradients suggested no significant role on most outcomes, except for death or rehospitalization, even if the risk of multiplicity cannot be disregarded, also given that this finding was significant only when considering this variable as a continuous one (Table S3).

**Table S1. Imaging at echocardiography and invasive coronary angiography, and electrocardiographic features.**

| Feature                                    | Naïve        | Prior MitraClip | Prior mitral surgery | Overall P | Subgroup P* |
|--------------------------------------------|--------------|-----------------|----------------------|-----------|-------------|
| Patients                                   | 2169         | 29              | 40                   | -         | -           |
| LV end-diastolic diameter (mm)             | 59.1±10.8    | 64.0±9.6        | 56.5±9.7             | 0.018     | 0.003       |
| LV end-systolic diameter (mm)              | 44.2±13.1    | 52.0±9.9        | 44.7±14.2            | 0.013     | 0.048       |
| LV end-diastolic volume (mL)               | 157±69       | 188±85          | 141±53               | 0.025     | 0.010       |
| LV end-systolic volume (mL)                | 95±60        | 128±75          | 77±46                | 0.003     | 0.001       |
| LV ejection fraction (%)                   | 42.5±14.8    | 33.2±12.6       | 49.3±13.7            | <0.001    | <0.001      |
| Mean mitral gradient (mm Hg)               | 2.1±0.9      | 2.6±0.9         | 3.4±2.2              | <0.001    | 0.434       |
| Severe mitral regurgitation                | 1696 (78.2%) | 17 (58.6%)      | 33 (82.5%)           | 0.041     | 0.054       |
| Tethering                                  |              |                 |                      | 0.061     | 0.706       |
| No                                         | 1410 (65.0%) | 24 (82.8%)      | 33 (82.5%)           |           |             |
| Symmetric                                  | 479 (22.1%)  | 4 (13.8%)       | 4 (10.0%)            |           |             |
| Asymmetric                                 | 280 (12.9%)  | 1 (3.5%)        | 3 (7.5%)             |           |             |
| Leaflet prolapse                           | 610 (28.1%)  | 3 (10.3%)       | 24 (60.0%)           | <0.001    | <0.001      |
| Flail leaflet                              | 441 (20.3%)  | 2 (6.9%)        | 14 (35.0%)           | 0.015     | 0.008       |
| Severe calcification                       | 105 (4.8%)   | 1 (3.5%)        | 1 (2.5%)             | 1         | 1           |
| Tricuspid regurgitation                    |              |                 |                      | 0.018     | 0.027       |
| None                                       | 106 (4.9%)   | 1 (3.5%)        | 5 (12.5%)            |           |             |
| Mild                                       | 823 (37.9%)  | 5 (17.2%)       | 16 (40.0%)           |           |             |
| Moderate                                   | 953 (43.9%)  | 18 (62.1%)      | 11 (27.5%)           |           |             |
| Severe                                     | 287 (13.2%)  | 5 (17.2%)       | 8 (20.0%)            |           |             |
| Systolic pulmonary artery pressure (mm Hg) | 47±14        | 52±16           | 43±15                | 0.080     | 0.042       |
| Coronary angiography                       | 956 (44.1%)  | 10 (34.5%)      | 23 (57.5%)           | 0.138     | 0.087       |
| Coronary artery disease type               |              |                 |                      | 0.587     | 0.310       |
| None                                       | 602 (63.0%)  | 5 (50.0%)       | 16 (69.6%)           |           |             |
| Single vessel disease                      | 155 (16.2%)  | 3 (30.0%)       | 4 (17.4%)            |           |             |
| Two vessel disease                         | 95 (9.9%)    | 2 (20.0%)       | 1 (4.4%)             |           |             |
| Three vessel disease                       | 59 (6.2%)    | 0               | 0                    |           |             |
| Left main disease                          | 45 (4.7%)    | 0               | 2 (8.7%)             |           |             |
| Any ECG abnormality                        | 589 (27.2%)  | 12 (41.4%)      | 15 (37.5%)           | 0.075     | 0.806       |
| Type II AV block                           | 4 (0.2%)     | 0               | 0                    | 1         | 1           |
| Type III AV block                          | 7 (0.3%)     | 0               | 0                    | 1         | 1           |
| Right bundle branch block                  | 54 (2.5%)    | 1 (3.5%)        | 1 (2.5%)             | 0.651     | 1           |
| Left bundle branch block                   | 79 (3.6%)    | 3 (10.3%)       | 0                    | 0.083     | 0.070       |
| Atrial fibrillation                        | 462 (21.3%)  | 5 (17.2%)       | 15 (37.5%)           | 0.054     | 0.106       |

\*comparing patients with prior MitraClip implantation vs those with prior mitral surgery; AV=atrioventricular

**Table S2. Medical therapy at discharge.**

| Feature                                                                 | Naïve        | Prior MitraClip | Prior mitral surgery | Overall P | Subgroup P* |
|-------------------------------------------------------------------------|--------------|-----------------|----------------------|-----------|-------------|
| Patients                                                                | 2108         | 28              | 40                   | -         | -           |
| Angiotensin-converting-enzyme inhibitor or angiotensin receptor blocker | 641 (30.6%)  | 6 (20.7%)       | 5 (12.5%)            | 0.020     | 0.507       |
| Calcium channel antagonist                                              | 178 (8.5%)   | 2 (6.9%)        | 1 (2.5%)             | 0.499     | 0.568       |
| Beta-blocker                                                            | 1589 (75.7%) | 23 (79.3%)      | 32 (80.0%)           | 0.815     | 1           |
| Ivabradine                                                              | 104 (5.0%)   | 1 (3.5%)        | 2 (5.0%)             | 1         | 1           |
| Furosemide                                                              | 1957 (93.3%) | 27 (93.1%)      | 37 (92.5%)           | 0.859     | 1           |
| Furosemide daily dose (mg)                                              | 82.3±83.7    | 110.2±80.9      | 61.3±32.4            | 0.070     | 0.002       |
| Potassium-sparing diuretic                                              | 1171 (56.1%) | 20 (69.0%)      | 31 (77.5%)           | 0.009     | 0.579       |
| Aspirin                                                                 | 1217 (58.1%) | 14 (48.3%)      | 26 (65.0%)           | 0.387     | 0.218       |
| Thienopyridine                                                          | 941 (45.0%)  | 16 (55.2%)      | 19 (47.5%)           | 0.525     | 0.628       |
| Anti-vitamin K agent                                                    | 521 (24.9%)  | 9 (31.0%)       | 11 (27.5%)           | 0.621     | 0.793       |
| Novel oral anticoagulant                                                | 521 (24.9%)  | 6 (20.7%)       | 11 (27.5%)           | 0.838     | 0.581       |
| Inotropic agent                                                         | 18 (0.9%)    | 1 (3.5%)        | 0                    | 0.264     | 0.420       |

**Table S3. Association between clinical outcomes and mean mitral gradient at discharge.**

| Outcome                                              | Hazard ratio   |                         | P     |
|------------------------------------------------------|----------------|-------------------------|-------|
|                                                      | Point estimate | 95% confidence interval |       |
| Gradient as continuous variable (mm Hg)              |                |                         |       |
| Death                                                | 1.03           | 0.99-1.07               | 0.099 |
| Cardiac death                                        | 1.02           | 0.96-1.07               | 0.588 |
| Rehospitalization                                    | 1.01           | 0.96-1.07               | 0.600 |
| Rehospitalization for heart failure                  | 1.01           | 0.95-1.07               | 0.838 |
| Death or rehospitalization                           | 1.03           | 1.00-1.06               | 0.041 |
| Cardiac death or rehospitalization for heart failure | 1.02           | 0.98-1.06               | 0.301 |
| Heart failure                                        | 1.02           | 0.98-1.08               | 0.330 |
| Gradient as dichotomous variable (>5 vs ≤5 mm Hg)    |                |                         |       |
| Death                                                | 1.20           | 0.94-1.59               | 0.139 |
| Cardiac death                                        | 0.99           | 0.66-1.47               | 0.972 |
| Rehospitalization                                    | 1.00           | 0.69-1.45               | 0.997 |
| Rehospitalization for heart failure                  | 1.02           | 0.69-1.53               | 0.907 |
| Heart failure                                        | 1.05           | 0.73-1.52               | 0.789 |
| Death or rehospitalization                           | 1.24           | 0.99-1.56               | 0.067 |
| Cardiac death or rehospitalization for heart failure | 1.07           | 0.80-1.43               | 0.655 |
